# Supplementary material for: A dynamic epibiont community associated with the bone eating worm Osedax
Source: Research Square preprint supplement (doi:10.21203/rs.3.rs-2341896/v1), 2022-12-07
Supplement: Supplementary file 1 [file 7ee19c98ed1bd63359821ac5.pdf]

**Table 1:** Sample locations, along with dive information, time frame, and *Osedax* species identities for specimens used in this study.

| Whale                             | Dive no. <sup>4</sup> | Date      | Time frame (months) | <i>Osedax</i> species present     |
|-----------------------------------|-----------------------|-----------|---------------------|-----------------------------------|
| Davidson <sup>1*</sup><br>(3239m) | H1796                 | Oct 2019  | 8                   | n.sp                              |
|                                   | H1825                 | Oct 2020  | 20                  | <i>lonnyi</i>                     |
| Monterey <sup>2</sup><br>(1018m)  | T916                  | Nov 2005  | 13                  | <i>roseus</i>                     |
|                                   | T919                  | Nov 2005  | 13                  | <i>roseus</i>                     |
|                                   | T931                  | Jan 2006  | 15                  | <i>roseus</i>                     |
|                                   | T1049                 | Oct 2006  | 24                  | <i>packdorum</i>                  |
|                                   | DR009                 | Mar 2009  | 52                  | <i>talkovici</i>                  |
|                                   | DR095                 | Nov 2009  | 61                  | <i>talkovici</i>                  |
|                                   | DR928                 | Feb 2017  | 148                 | <i>packdorum</i>                  |
|                                   | DR966                 | July 2017 | 154                 | <i>packdorum</i>                  |
|                                   | DR1029                | May 2018  | 164                 | <i>packdorum/talkovici</i>        |
|                                   | DR1105                | Dec 2018  | 171                 | <i>packdorum/talkovici</i>        |
|                                   | DR1112                | Jan 2019  | 172                 | <i>packdorum/talkovici/randyi</i> |
| Monterey <sup>3*</sup><br>(2891m) | T769                  | Nov 2004  | 34 <sup>†</sup>     | <i>frankpressi</i>                |
|                                   | T991                  | May 2006  | 51                  | <i>frankpressi</i>                |

<sup>1</sup> Natural whalefall discovered October 2019 (35.582°N/122.629°W)

<sup>2</sup> Artificial whalefall implanted October 2004 (36.772°N/122.083°W)

<sup>3</sup> Natural whalefall discovered February 2002 (36.613°N/122.434°W)

<sup>4</sup> H = ROV Hercules, T = ROV Tiburon, DR = ROV Doc Ricketts

<sup>†</sup> Used for metagenomics only

\* Both natural whalefalls were estimated to have been on the seafloor at least 8 months, based on tissue condition, which was remarkably similar (compare Figure 1 to Goffredi et al. 2004 Figure 1; time frame = initial visit + 8 months)
